# Supplementary material
Source: PubMed Central journal article supplement (PMC2919207)
Supplement: NIHMS222002-supplement-1_si_001.pdf [file NIHMS222002-supplement-1_si_001.pdf]

## Supporting Information

### **Magic Angle Spinning NMR Analysis of $\beta_2$ -Microglobulin Amyloid Fibrils in Two Distinct Morphologies**

*Galia T. Debelouchina<sup>1,2</sup>, Geoffrey W. Platt<sup>3,4</sup>, Marvin J. Bayro<sup>1,2</sup>, Sheena E. Radford<sup>3,4</sup>,  
Robert G. Griffin<sup>1,2</sup>*

<sup>1</sup>Department of Chemistry  
and

<sup>2</sup>Francis Bitter Magnet Laboratory  
Massachusetts Institute of Technology  
Cambridge, MA 02139, USA

<sup>3</sup>Astbury Centre for Structural Molecular Biology  
University of Leeds, Leeds LS2 9JT, UK

<sup>4</sup>Institute of Molecular and Cellular Biology  
University of Leeds, Leeds LS2 9JT, UK

rgg@mit.edu

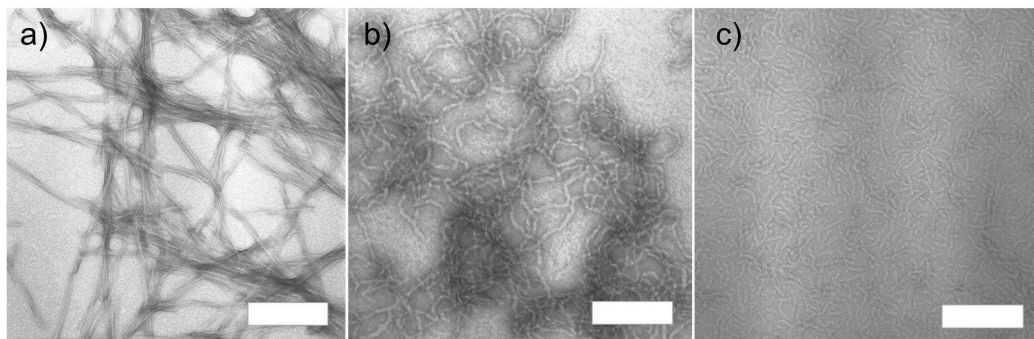

**Figure S1:** EM images of the a) LS fibrils and WL fibrils b) before pelleting and in 200 mM ammonium formate buffer (pH 3.6), and c) four weeks after pelleting in 50 mM ammonium formate buffer (pH 3.6). No evidence of other fibril forms is observed before or after pelleting. The scale bars represent 200 nm.

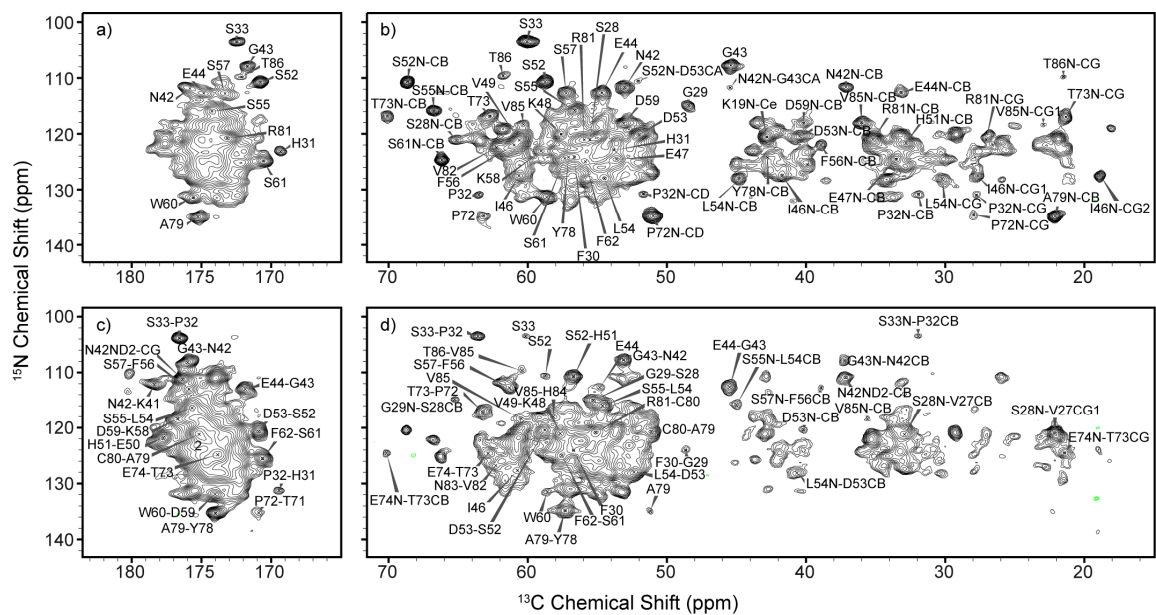

**Figure S2:** a) and b) NCACX and c) and d) NCOCX experiments obtained at 700 MHz,  $\omega_r/2\pi = 12.5$  kHz with a U- $\beta_2$ m fibril sample. 3 ms DCP was employed for  $^{15}\text{N}$ - $^{13}\text{C}$  transfer, and RFDR mixing was used for  $^{13}\text{C}$ - $^{13}\text{C}$  transfer ( $\tau_{\text{mix}} = 3.8$  ms). The labels correspond to a) N-CO, b) N-C $\alpha$ , c) N $_i$ -CO $_{i-1}$ , d) N $_i$ -C $\alpha_{i-1}$  and N-C $\alpha$  correlations unless otherwise noted.

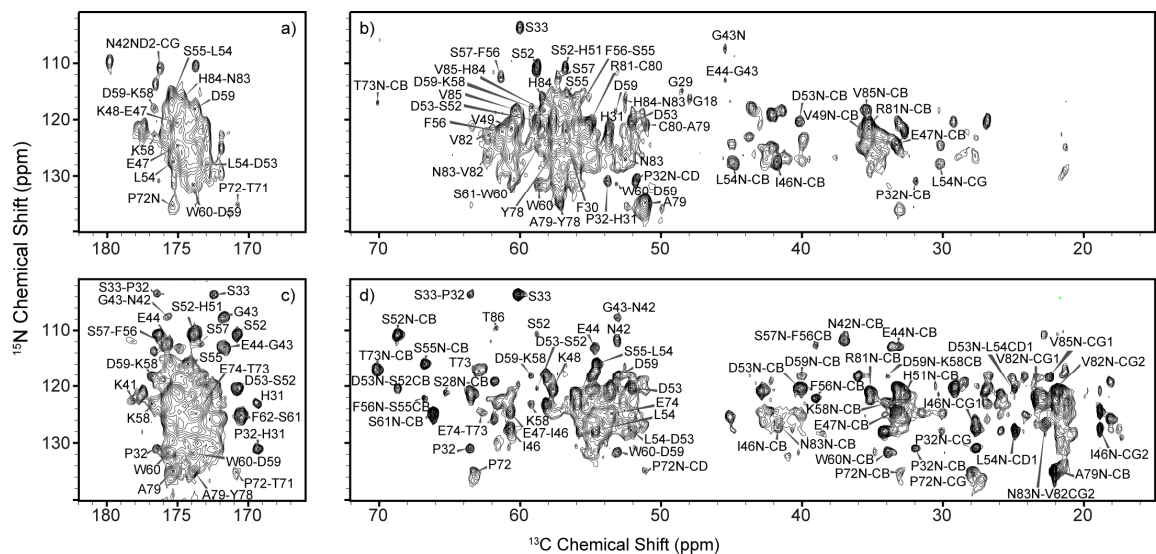

**Figure S3:**  $^{15}\text{N}$ - $^{13}\text{C}$  correlation experiments recorded with TEDOR mixing ( $\tau_{\text{mix}} = 6.4$  ms) and  $\omega_r/2\pi = 12.5$  kHz. (a) and b) 2-  $\beta_2\text{m}$  fibril sample, data recorded at 500 MHz, c) and d) 1,3-  $\beta_2\text{m}$  fibril sample, data recorded at 750 MHz. The labels correspond to a) and c)  $\text{N}_i\text{-CO}_{i-1}$  and N-CO, b) and d) N-C $\alpha$  and  $\text{N}_i\text{-C}\alpha_{i-1}$  correlations unless otherwise noted.
